# Supplementary material for: Low Vitamin C Status in Patients with Cancer Is Associated with Patient and Tumor Characteristics
Source: MDPI journal article supplement (doi:10.3390/nu12082338), 2020-08-05
Supplement: s1 [file s1]

**Table S1:** Characteristics of the two cohorts of patients with cancer.

|                                                                       | Pre-surgical cohort |                | Therapy cohort <sup>a</sup> |                |
|-----------------------------------------------------------------------|---------------------|----------------|-----------------------------|----------------|
|                                                                       | total               | fasting        | total                       | fasting        |
| <b>Participants (n=)</b>                                              | 99                  | 81             | 100                         | 69             |
| <b>Sex (% females)</b>                                                | 61.6                | 61.0           | 62.0                        | 56.5           |
| <b>Ethnicity (% Maori/Pacific)</b>                                    | 9.1                 | 11.0           | 6.0                         | 8.7            |
| <b>Age (years, mean <math>\pm</math>SEM)</b>                          | 64.0 $\pm$ 1.2      | 63.6 $\pm$ 1.4 | 59.6 $\pm$ 1.4              | 58.7 $\pm$ 1.7 |
| <b>BMI (mean <math>\pm</math>SEM)</b>                                 | 29.9 $\pm$ 0.7      | 30.4 $\pm$ 0.8 | 28.6 $\pm$ 0.7              | 28.6 $\pm$ 0.9 |
| <b>Smoking (% current smokers)</b>                                    | 5.1                 | 4.9            | 11.0                        | 13.0           |
| <b>Exercise (% doing &lt;60min/week)</b>                              | 23.2                | 24.4           | 26.0                        | 29.0           |
| <b>Ascorbate intake (mg/day, mean <math>\pm</math>SEM)</b>            | 61.5 $\pm$ 5.7      | 61.0 $\pm$ 6.2 | 82.8 $\pm$ 14.4             | 61.9 $\pm$ 6.7 |
| <b>(mg/day, median)</b>                                               | 42.0                | 43.0           | 53.9                        | 46.9           |
| <b>Supplement use (% taking supplements) <sup>b</sup></b>             | 28.3                | 18.3           | 32.0                        | 18.8           |
| <b>High dose ascorbate infusion (%) <sup>c</sup></b>                  | 1.0                 | 0              | 4.0                         | 1.4            |
| <b>Plasma ascorbate (<math>\mu</math>M, mean <math>\pm</math>SEM)</b> | 65.4 $\pm$ 3.1      | 57.2 $\pm$ 2.7 | 55.1 $\pm$ 3.0              | 46.8 $\pm$ 3.2 |
| <b>(<math>\mu</math>M, median)</b>                                    | 60.8                | 58.4           | 53.6                        | 44.6           |
| <b>Cancer type (%)</b>                                                |                     |                |                             |                |
| <b>Breast</b>                                                         | 35.4                | 32.9           | 36.0                        | 31.9           |
| <b>Colorectal</b>                                                     | 20.2                | 19.5           | 18.0                        | 17.4           |
| <b>Prostate</b>                                                       | 10.1                | 12.2           | 3.0                         | 4.3            |
| <b>Skin</b>                                                           | 2.0                 | 2.4            | 17.0                        | 14.5           |
| <b>Endometrial</b>                                                    | 7.1                 | 8.5            |                             |                |
| <b>Urothelial</b>                                                     | 6.1                 | 7.3            | 1.0                         | 1.4            |
| <b>Lymphoma</b>                                                       |                     |                | 6.0                         | 7.2            |
| <b>Other</b>                                                          | 19.2                | 17.2           | 19.0                        | 23.3           |
| <b>Tumour stage (TNM)</b>                                             |                     |                |                             |                |
| <b>Stage 1/2</b>                                                      | 58                  | 48             | 28                          | 19             |
| <b>Stage 3</b>                                                        | 24                  | 19             | 18                          | 11             |
| <b>Stage 4/Metastasis/Recurrence</b>                                  | 13                  | 12             | 47                          | 39             |
| <b>missing</b>                                                        | 4                   | 2              | 7                           | 0              |

<sup>a</sup>Therapy cohort includes patients treated with chemotherapy and immunotherapy; <sup>b</sup>Supplement use is self-reported and includes 'not regularly', 'fairly regularly' and 'today'; <sup>c</sup>High dose ascorbate infusion includes all those who have ever had an infusion for any reason and at any dose.
